# Supplementary material for: Osteopontin promotes epithelial-mesenchymal transition of hepatocellular carcinoma through regulating vimentin
Source: PubMed Central journal article supplement (PMC4914337; doi:10.18632/oncotarget.7016), 2016-01-25
Supplement: oncotarget-07-12997-s001.pdf [file oncotarget-07-12997-s001.pdf]

## Osteopontin promotes epithelial-mesenchymal transition of hepatocellular carcinoma through regulating vimentin

### Supplementary Materials

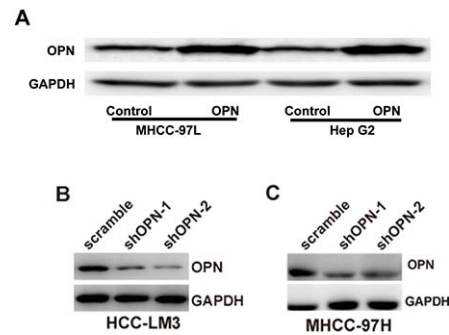

**Supplementary Figure S1: OPN protein levels in HCC cells detected by western blot.** (A) Overexpression of OPN protein levels in MHCC-97L and HepG2 cells detected by western blot. B,C. The knockdown levels of OPN protein in HCC-LM3 (B) and MHCC-97H (C) cells detected by western blot.

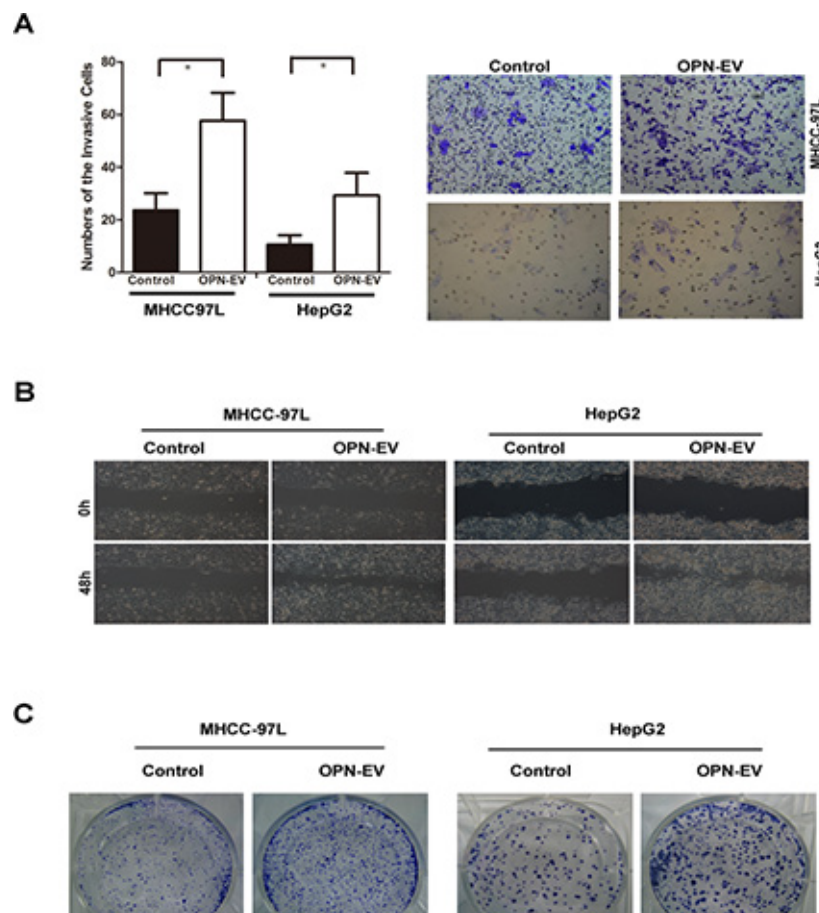

**Supplementary Figure S2: The effects of OPN up-regulation on the *in vitro* invasion and migration of HCC cells.** The *in vitro* (A) invaded cell numbers, (B) wound healing rates (C) and colony formation activity of the OPN- MHCC-97L and OPN-HepG2 cells were significantly increased compared with the controls. \* $P < 0.05$ .

**A** >sp|P08670|VIME\_HUMAN Vimentin OS=Homo sapiens GN=VIM PE=1 SV=4  
MSTRSVSSSS YRRMFGPGT ASRPSSRSY VTTSTRYSL GSALRPSTSR  
SLYASSPGGV YATRSSAVRL RSVVGVRLI QDSVDFSLAD AINTEFKNTR  
TNEKVELQEL NDRFANYDK VRFLEQQNKI LLAELQELG QGKSRIGDLY  
EEEMRELRRQ VDQLTNDKAR VEVERDNLAE DIMRLREKIQ EEMLQRBEAE  
NTLQSFQDV DNASLARLDL ERKVESLQEE IAPLKKLHEE EIQLQAAQIQ  
EQIVQIDVDV SKPDLTAALR DVKQYESVA AKNLQEEEW YKSKFADLSE  
AANRNDALR QAKQESTEYR RQVQSLTCEV DALKGTNESL ERQRMHEEEN  
FAVEAANYQD TIGRLQDEIQ NMKEEMARIL REYQQLLVK MALDIEIATY  
RKLLEGEESR ISLPLPNFSS LNLRETNLDS LPLVDTHSKR TLLIKTVETR  
DQVINETSQ IHIDDLE

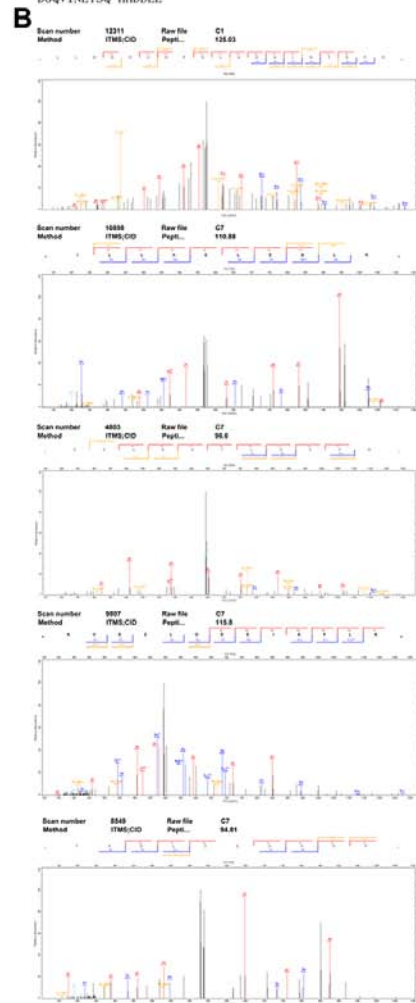

**Supplementary Figure S3: MS results of vimentin protein identification.** (A) Identified sequences (Red) covered 13.5% of the full-length vimentin protein sequence. (B) Mass spectra of selected sequences.

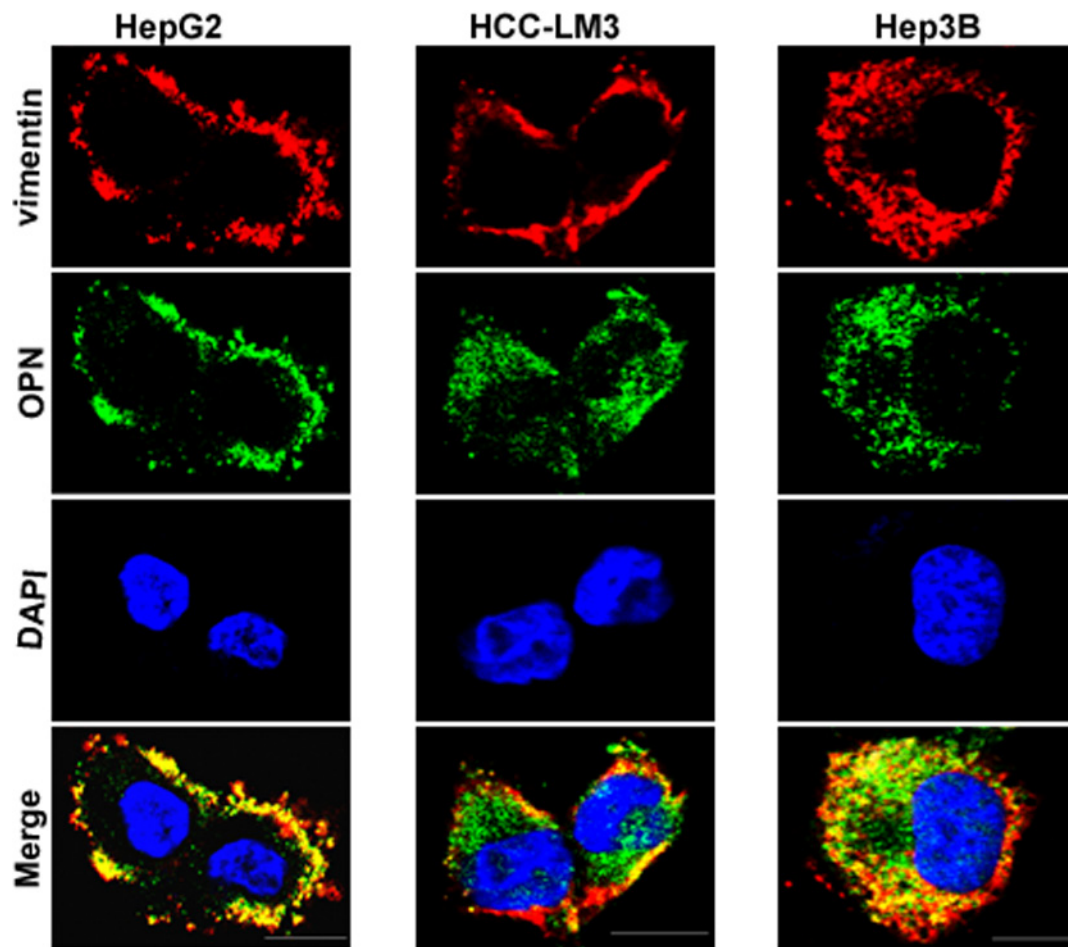

**Supplementary Figure S4: Colocalization of OPN (green) and vimentin (red) in HCC cells by immunofluorescence.** Nuclei were stained with DAPI. (Bar = 10  $\mu$ m).

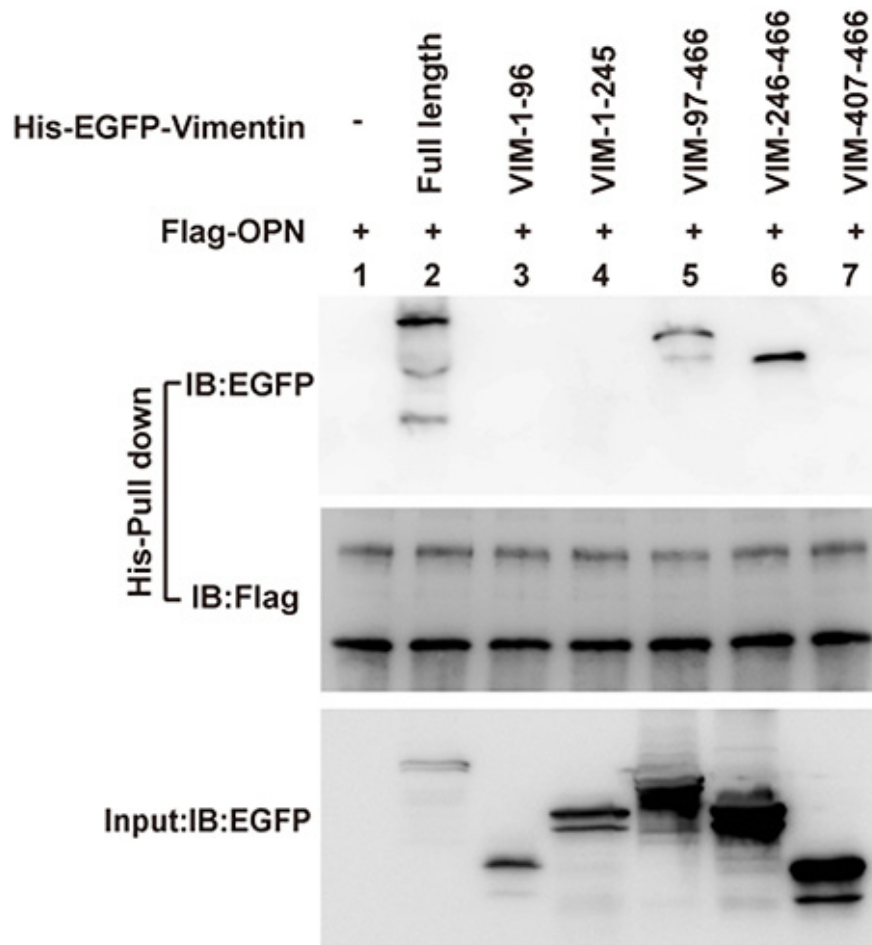

**Supplementary Figure S5: Vimentin binds to OPN by *in vitro* binding assay.** *In vitro* binding assay show that full-length and 246–466 fragment of Vimentin binds to OPN. The inputs are 2% of total purified proteins.

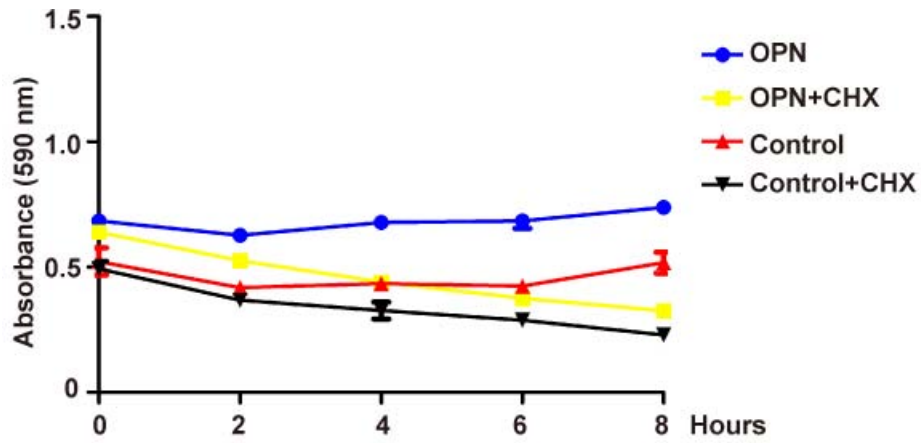

Supplementary Figure S6: Cytotoxic effects of cycloheximide at different time points on MHCC-97L cell lines stably transfected with OPN or empty vector.

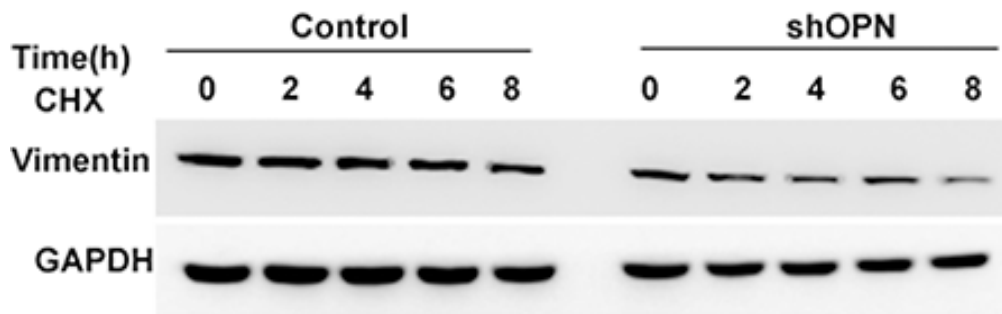

Supplementary Figure S7: MHCC-97H cells with stable knockdown of OPN were treated CHX (20  $\mu\text{g}/\text{mL}$ ) for indicated times. Endogenous vimentin protein levels were determined. MHCC-97H cells were stably transfected with empty vector used as control.

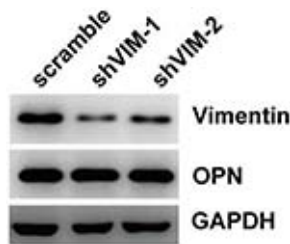

Supplementary Figure S8: The knockdown levels of vimentin protein in HepG2-OPN cells detected by western blot.

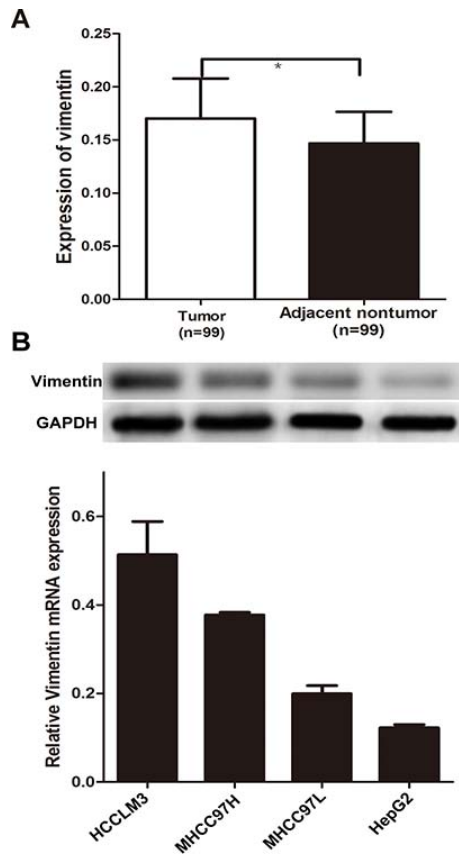

**Supplementary Figure S9: The expression levels of vimentin in tumor tissues from patients with HCC and HCC cell lines.** (A) Expression of vimentin levels in primary tumors and their corresponding adjacent nontumorous liver tissues of patients with HCC. (B) The mRNA (upper) and protein (lower) levels of vimentin in HCC cell lines with different metastatic potentials examined by qRT-PCR and Western blot. \* $P < 0.05$ . Bars = mean  $\pm$  S.D.,  $n = 3$ .

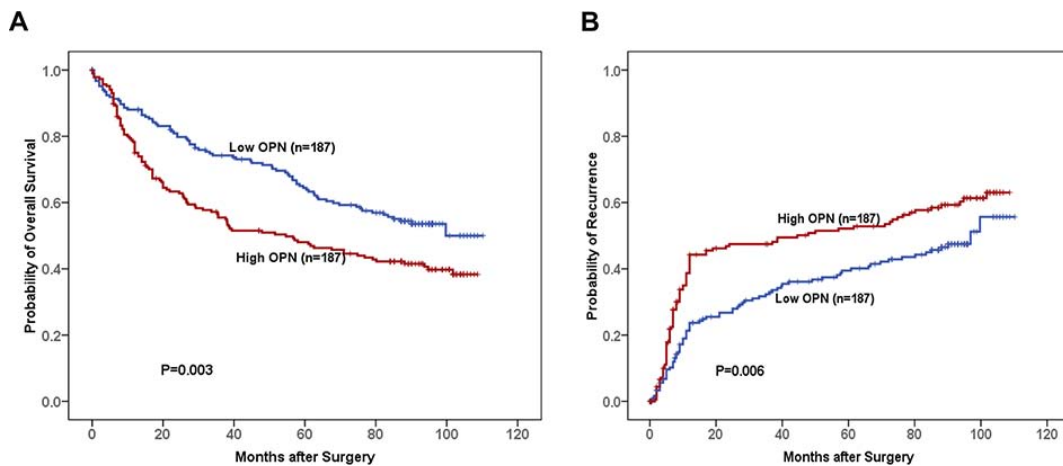

**Supplementary Figure S10: The expression levels of OPN in HCC tissues.** A,B. The differences in (A) overall survival rates and (B) possibilities of tumor recurrence between two groups of patients with different OPN expression levels after HCC resection. A “low” versus “high” OPN expression was defined according to the cut-off values of OPN level which were defined as the median of the cohort.

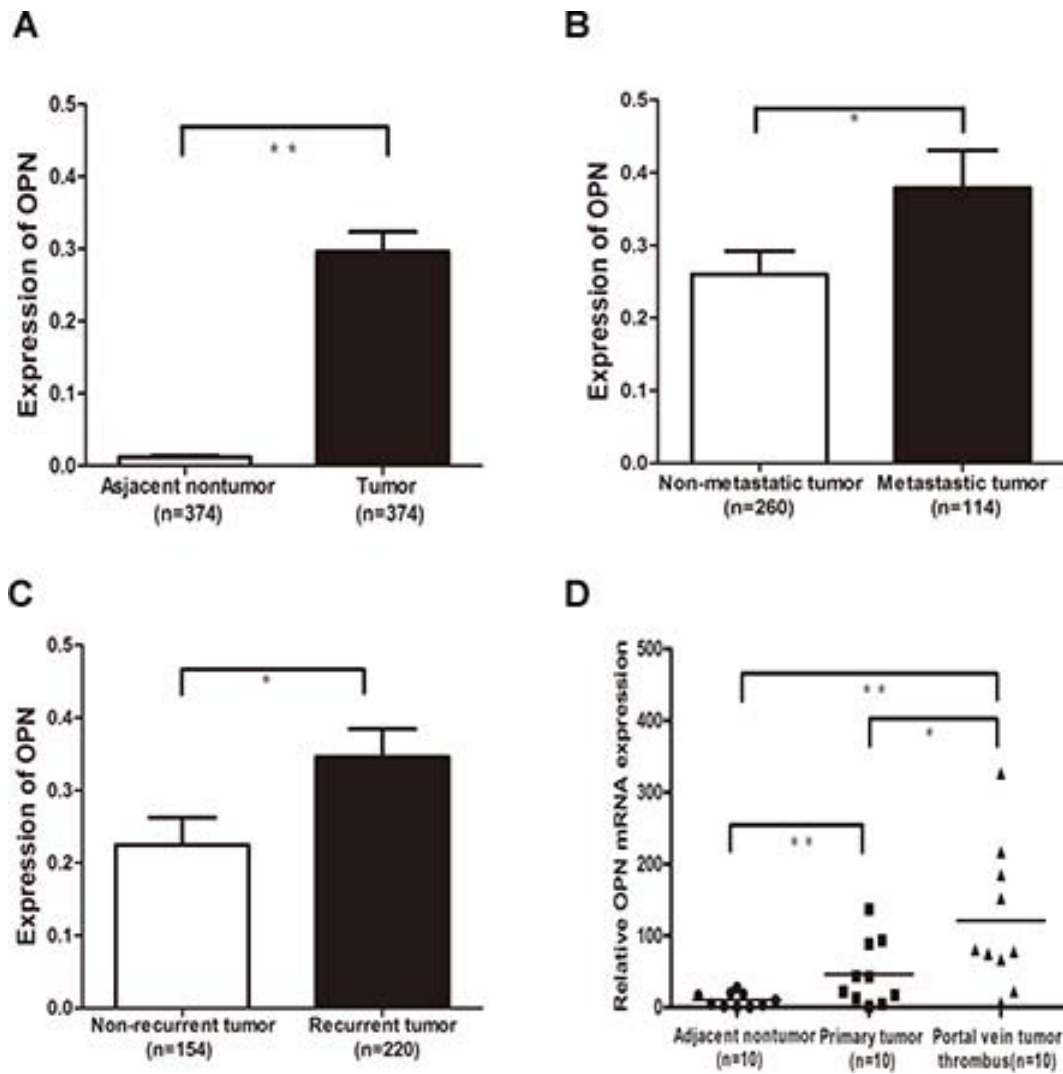

**Supplementary Figure S11: The expression levels of OPN in HCC tissues.** A,B,C. Comparing differences in the protein levels of OPN between (A) tumor and corresponding non-tumor tissues, (B) metastatic and non-metastatic HCC tissues, (C) tumor tissues from recurrent and non-recurrent groups. (D) Comparison of OPN mRNA levels in 10 pairs of HCC tissue samples between adjacent nontumorous liver tissues, primary HCC and their portal vein tumor thrombus. \* $P < 0.05$ , \*\* $P < 0.01$ .

**Supplementary Table S1: The Clinicopathological characteristics of 374 patients with HCC**

| Characteristics                        | No. of Patients (%) ( <i>n</i> = 374) |
|----------------------------------------|---------------------------------------|
| Age—yr                                 |                                       |
| Median                                 | 51.87                                 |
| Interquartile range                    | 22~76                                 |
| Male sex — no. (%)                     | 306 (81.8)                            |
| HBV infection — no. (%)                | 348 (93.0)                            |
| Tumor number > 1 — no. (%)             | 18 (4.8)                              |
| Tumor diameter — cm                    |                                       |
| Median                                 | 4.22                                  |
| Interquartile range                    | 1.0~29                                |
| Vascular invasion — no. (%)            | 114 (30.5)                            |
| Alpha-fetoprotein > 20 ng/ml — no. (%) | 236 (63.1)                            |
| Liver cirrhosis — no. (%)              | 332 (88.8)                            |
| Tumor encapsulation — no. (%)          | 173 (46.3)                            |
| Tumor differentiation — no. (%)        |                                       |
| I~II                                   | 280 (74.9)                            |
| III~IV                                 | 94 (25.1)                             |
| BCLC stage — no. (%)                   |                                       |
| 0 and A                                | 97 (25.9)                             |
| B and C                                | 277 (74.1)                            |

Note : BCLC stage, Barcelona Clinic Liver Cancer stage.
